# 1 EVOLUTIONARY HIGHWAYS TO 2 PERSISTENT INFECTION BY 3 *PSEUDOMONAS AERUGINOSA*

4 Jennifer A Bartell<sup>1,\*</sup>, Lea M Sommer<sup>2,\*</sup>, Janus A J Haagensen<sup>1</sup>, Anne Loch<sup>1</sup>, Rocio Espinosa<sup>1</sup>,  
5 Søren Molin<sup>1</sup>, and Helle Krogh Johansen<sup>2,3</sup>

6  
7 <sup>1</sup>The Novo Nordisk Foundation Center for Biosustainability, Technical University of  
8 Denmark, 2800 Kgs. Lyngby, Denmark.

9 <sup>2</sup>Department of Clinical Microbiology, Rigshospitalet, 2100 Copenhagen Ø, Denmark.

10 <sup>3</sup>Department of Clinical Medicine, Faculty of Health and Medical Sciences, University of  
11 Copenhagen, Copenhagen, Denmark.

12

13 \*Corresponding authors and equal contribution

14

## 15 SUMMARY

16 Persistent infections require bacteria to evolve from their naïve colonization state by  
17 optimizing fitness in the host. Bacteria may follow the same adaptive path, but many  
18 distinct paths could enable equally successful persistence. Here, we map the development  
19 of persistent infection over 10 years by screening 8 infection-relevant phenotypes of 443  
20 longitudinal *Pseudomonas aeruginosa* isolates from 39 young cystic fibrosis patients. Using  
21 Archetype Analysis to map the multi-trait evolutionary continuum and Generalized Additive  
22 Mixed Models to identify trait correlations accounting for patient-specific influences, we  
23 find: 1) a 2-3 year timeline of rapid substantial adaptation after colonization, 2) variant  
24 "naïve" and "adapted" states reflecting discordance between phenotypic and molecular  
25 adaptation and linked by distinct evolutionary trajectories, and 3) new phenotypes  
26 associated with pathoadaptive mutations. Our results underline the environmental

27 influences affecting evolution of complex natural populations, while providing a clinically  
28 accessible approach for tracking patient-specific pathogen adaptation to guide treatment.

## 29 KEYWORDS

30 Evolution; Persistent Infection; Antibiotic Resistance; Cystic fibrosis; *Pseudomonas*  
31 *aeruginosa*; Clinical Isolates; Longitudinal Analysis; Data Modeling; Genotype-Phenotype  
32

## 33 INTRODUCTION

34 Bacteria have spent millennia evolving complex and resilient modes of adaptation to new  
35 environments, and many species can also effectively deploy these skills as pathogens during  
36 colonization and persistence within human hosts (Flores-Mireles et al., 2015; Lieberman et  
37 al., 2014; Rau et al., 2010). As they gradually increase their fitness via accumulating genetic  
38 and epigenetic changes, distinct pathogen populations may travel along the same  
39 predictable path to successful colonization. However, many other unique sequences of  
40 multi-trait adaptation could enable equally successful persistence (Cohen-Cymerknoh et  
41 al., 2011). This makes it difficult to pinpoint specific traits that signal the state of pathogen  
42 fitness and associated risk of an incurable chronic infection, complicating patient treatment  
43 intended to inhibit persistence. Meanwhile, recurrent, treatment-resistant infections are  
44 increasing problems worldwide (Flores-Mireles et al., 2015; Kline and Bowdish, 2016; May,  
45 2014; O'Neill, 2016).

46  
47 Even for a well-studied model system of bacterial persistence and chronic infection such as  
48 the airway infections of cystic fibrosis (CF) patients, evolutionary trajectories remain difficult  
49 to map due in part to the competing modes of evolution at play in these patients. While the  
50 general scientific consensus of the field is that select traits converge to similar states during  
51 most infections (such as loss of virulence and increase in antibiotic resistance), studies have  
52 also shown a high degree of population heterogeneity (Jorth et al., 2015; Lieberman et al.,  
53 2014; Markussen et al., 2014; Winstanley et al., 2016). This heterogeneity could be  
54 influenced by two distinct modes of evolution: 1) parallel, independent evolution caused by  
55 spatial segregation for long-term chronic infected patients (Jorth et al., 2015; Markussen et  
56 al., 2014) or 2) diversification, or “bet hedging”, creating resilient populations (Yachi et al.,

57 1999) from the early colonization stage, where greater mixing of the environment and  
58 bacterial populations is possible (Johansen et al., 2012).

59

60 In this study, we map the development of persistent bacterial infections by phenotypically  
61 screening a collection of 443 longitudinal clinical *Pseudomonas aeruginosa* isolates from 39  
62 young CF patients, measuring how 8 infection-relevant traits adapt during the initial 10  
63 years of colonization. While laboratory evolution studies have measured phenotypic  
64 adaptation to a new, minimal media environment which generally occurs within the initial  
65 5,000-10,000 generations, only estimates are available for the period of significant  
66 adaptation in complex host environments like the CF lung (based on growth rates and  
67 genetic adaptation) (Barrick et al., 2009; Woods et al., 2011; Yang et al., 2011). Thus, we  
68 provide new insights into the *in vivo* transition from initial colonization to persistent chronic  
69 infection. Previous studies have provided information on the genetic evolution of single  
70 clonal lineages of human pathogens and identified specific genetic adaptations that  
71 correlated with the ability to colonize and persist (Marvig et al., 2013, 2015; Smith et al.,  
72 2006). While some studies have paired these findings with phenotypic observations (Rau et  
73 al., 2010; Silva et al., 2016; Sommer et al., 2016; Yang et al., 2011) in order to associate  
74 genetic changes with phenotypic changes, this is especially challenging in natural  
75 populations. Genotype-phenotype links are eroded over the course of evolution by  
76 environment-based tuning of pathogen activity, or “acclimation”, and accumulation of  
77 mutations, or “genetic adaptation”. Therefore, the genotype alone cannot provide a  
78 complete predictive picture of the adaptation process (Jansson and Baker, 2016; Jansson  
79 and Hofmockel, 2018), and we therefore propose that phenotypic characterization is equally  
80 important for the understanding of evolution.

81

82 To map adaptation of the pathogen lineages infecting our patients, we analyzed our  
83 phenotypic dataset using generalized additive mixed models (GAMMs) and archetype  
84 analysis (AA), reassessing current theories of phenotypic evolution in the CF airways. We  
85 identify emergent patterns of bacterial phenotypic change across our patient cohort that  
86 depart from expected evolutionary paths and estimate the length of the period of initial  
87 rapid adaptation letting the bacteria transition from a “naïve” to a “chronic” phenotypic  
88 state. We further identify distinct and repeating trajectories of pathogen evolution, and by

89 leveraging our prior molecular study of this isolate collection, we propose mechanistic links  
90 between these phenotypic phenomena and genetic adaptation. These findings support the  
91 promise of using select phenotypic traits to track pathogen adaptation across a patient  
92 population, monitor patient-specific infection states, tailor the use of antibiotics, and  
93 eventually inhibit the transition to a persistent and chronic infection.

94

## 95 RESULTS

96 First, we present our 8-phenotype screen and associated summary statistics. To  
97 contextualize our interpretation of this data, we then describe our data-driven modeling  
98 approach and validation. Finally, we use our models to identify and present significant  
99 evolutionary trends that contribute to persistence of *P. aeruginosa* in our CF patient cohort.

100

### 101 Evaluating pathogen adaptation in the early stage of infection

102 *A unique dataset.* The 443 clinical *P. aeruginosa* isolates in this study originate from a cohort  
103 of 39 children with CF (median age at first *P. aeruginosa* isolate = 8.1 years) treated at the  
104 Copenhagen CF Centre at Rigshospitalet and capture the early period of adaptation,  
105 spanning 0.2-10.2 years of colonization by a total of 52 clone types. Of these isolates, 373  
106 were previously characterized in a molecular study of adaptation (Marvig et al., 2015).

107 When we discuss time in this study, we generally refer to the “colonization time of an  
108 isolate” (CoIT). This is defined for each specific lineage as the time since colonization was  
109 first identified in a patient until the isolate in question was sampled. This enables us to have  
110 an approximate reference for when the bacteria initially transferred from one environment  
111 to another and adaptation to the CF airways could begin. It is important to note that the  
112 first time *P. aeruginosa* is identified in a patient sample is not likely to be the true “time  
113 zero” of adaptation, since a significant bacterial load is necessary for reliable culturing.

114

115 In contrast to our previous study, here we focus on phenotypic characterization including  
116 measurement of 8 phenotypes that encompass growth rates, antibiotic susceptibility,  
117 virulence factors, and adherence (Figure 1 and 2); we define adherence as a shared trend in  
118 adhesion and aggregation which we associate with a biofilm-like lifestyle. These phenotypes  
119 are generally accepted to change over the course of colonization and infection of CF patient

120   airways (Jiricny et al., 2014; López-Causapé et al., 2017; Silva et al., 2016; Winstanley et al.,  
121   2016; Yang et al., 2008) and also lend themselves to high-throughput screening. That is, an  
122   evolved isolate would grow slowly, adhere proficiently, be more likely to exhibit a mucoid  
123   and/or hypermutator phenotype, have reduced protease production, and resist antibiotics,  
124   in contrast to a naïve isolate. However, a visual inspection of our measurements ordered by  
125   the colonization time does not indicate an overarching adaptive trajectory from naïve to  
126   evolved phenotypes (Figure 2). Instead, we find isolates that resemble both “naïve” and  
127   “evolved” phenotypic states throughout the study period.

128

129   *Modeling multi-trait evolution.* To analyze our dataset capturing the scale, complexity, and  
130   noise of pathogen adaptation in a population of patients, we need to use modeling methods  
131   that minimize patient-specific effects, smooth irregular sampling intervals and enable the  
132   mapping of multi-trait evolution from start to end state. Our framework balances model  
133   complexity and precision – also known as “the bias-variance tradeoff”. We therefore 1)  
134   modeled the inherent dynamic continuum of multi-trait evolution using AA and 2) evaluated  
135   temporal correlations between phenotypic adaptation across patients by fitting cross-  
136   patient trendlines using GAMMs (Figure 1).

137

138   With AA, we relate each isolate according to its similarity to the isolates with the most  
139   extreme phenotypes in our collection. These extremities of our data, or “archetypes”, are  
140   positioned at the “corners” of the principal convex hull (PCH), the polyhedron of minimal  
141   volume that still fully encapsulates our phenotype dataset in a multi-dimensional trait space  
142   (Mørup and Hansen, 2012) that represents the pathogen evolutionary landscape of our  
143   young patient cohort. We conceptualize archetypes as the initial and final states of plausible  
144   adaptive trajectories across this landscape and predict both the number of archetypes and  
145   their distinct phenotypic profiles that best represent our data. In contrast to ordination  
146   approaches similar to Principal Component Analysis (PCA) which describes samples using  
147   ambiguous, difficult to interpret dimensions of major variance, AA describes each isolate  
148   contained within the principal convex hull in relation to its similarity to each archetype.  
149   Thus, the characteristics of each isolate are directly interpretable along an evolutionary  
150   continuum from “naïve” to “evolved” archetypes, comparable to the naïve and evolved  
151   phenotypic states as described above. To visualize this continuum, we relied on 2D

152 projections of our multivariate fits using a “simplex” plot as shown in Figure 3C (Seth and  
153 Eugster, 2016). Though this visualization obscures the true dimensionality of the isolate  
154 distribution by implying the archetypes are equidistant, we partly compensated for this by  
155 using PCA and biological insight gained from the GAMMs to guide archetype placement such  
156 that we maintain interpretability from an evolutionary perspective.

157

158 With the GAMMs, we want to predict whether a given phenotype (the “predicted” or  
159 “dependent” variable) significantly correlates with other phenotypes (the “explanatory” or  
160 “independent” variables). We do this by accounting for time as well as patient-specific  
161 environments as random effects via this flexible mixed model approach enabling both linear  
162 and nonlinear fits. We ultimately prioritize accuracy in our fits rather than forcing linear  
163 relationships that do not effectively capture natural evolutionary dynamics that we expect  
164 to vary from patient to patient. This accuracy and flexibility invariably increase the risk of  
165 overfitting. However, we counteract this by both the default penalization of fits inherent to  
166 the method used and by model estimation via restricted maximum likelihood (REML)  
167 (Wood, 2006). Furthermore, to avoid assumptions of “cause-and-effect” relationships  
168 between our variables, we implement a feature reduction approach; we permute through  
169 different one-to-one models of all phenotypes, and then combine the statistically significant  
170 individual phenotypes into a multi-feature model. We further remove any phenotype that  
171 loses significance in the multi-feature model, assuming that it is correlated with a more  
172 impactful phenotype. From this point, all mentions of significant relationships or  
173 correlations are obtained from the GAMM analyses with p-values < 0.01 based on Wald-  
174 type tests as described in (Wood, 2006, 2013), unless otherwise stated.

175

## 176 **Effective mapping of phenotypic trends**

177 *Archetype analysis.* AA predicted six distinctive archetypes sufficient to describe each isolate  
178 within the evolutionary landscape (Figure 3A). The simplex plot of Figure 3C shows  
179 annotation of the archetypes by the standout features of each archetype that contribute to  
180 its identification as an extremal corner of the dataset – we therefore only annotate by the  
181 highest or lowest values for each phenotype across all fitted archetype trait profiles and  
182 neglect moderate values (Figure 3B). This simplex key illustrates that two archetypes

183 resembled naïve and un-evolved isolates with fast growth, antibiotic susceptibility, and low  
184 adherence (Archetype A3 and A5). Meanwhile, two archetypes accounted for slow-growing  
185 evolved archetypes (A2 and A6). Two regions in the simplex visualization represent different  
186 focal points of adaptation, namely an increase in adherence (A2 and A4) versus ciprofloxacin  
187 resistance (A1 and A6). A substantial portion of isolates in our study resemble the “naïve”  
188 archetypes more closely than the “evolved” archetypes as indicated by their localization in  
189 the simplex plot (Figure 3C, most isolates cluster on the left near the “naïve” archetypes).  
190

191 *Generalized additive mixed models.* The GAMM analysis showed that we could statistically  
192 support relationships between traits across patients (Figure 3D). We find that the growth  
193 rates in Artificial Sputum Medium (ASM) and Lysogeny Broth (LB) are significantly correlated  
194 and therefore only refer to the growth rate in ASM from this point – this is closer to the *in*  
195 *vivo* conditions of the CF airway environment. When evaluating adaptation of the specific  
196 phenotypes over time we found that the survival time of a lineage in a patient's lungs had a  
197 significant correlation with both growth rate and sensitivity to ciprofloxacin but did not  
198 correlate with sensitivity to aztreonam (Figure 3C, Figure 4A and 4B). This difference reflects  
199 that the Copenhagen CF Centre regularly administers ciprofloxacin to the CF patients but  
200 not aztreonam (Hansen et al., 2008).  
201

202 An important distinction between AA and GAMMs is that many isolates clearly cluster in the  
203 AA simplex plot according to phenotypes whose adaptation is not significantly influenced by  
204 time of colonization as shown by GAMMs. This contrast shows the importance of combining  
205 these approaches to understand our data. As an example, both adhesion and aggregation  
206 do not correlate with colonization time for this population of young patients. Furthermore,  
207 the biofilm-related metric of mucoidity does not significantly correlate with any other  
208 measured phenotype, despite its use as an important biomarker of chronic infection in the  
209 Copenhagen CF Centre (Pedersen et al., 1992).  
210

210

### 211 **Initial adaptation happens within 3 years of colonization**

212 We suspect that the routes to successful persistence and a transition to chronic infection  
213 are initiated early in infection (Hansen et al., 2012; Marvig et al., 2015). During the initial

214 period of colonization spanning the first 2-3 years, the GAMMs indicate that a substantial  
215 change occurs in both growth rate and ciprofloxacin susceptibility, shown by the sharp  
216 slopes in this period (Figure 4A-B). Using AA, we also see a substantial shift of isolate  
217 distribution from “naïve” towards “evolved” archetypes in this adaptation window (Figure  
218 4C). Furthermore, the adaptation at 2-3 years of colonization is quite diverse, reaching the  
219 outer boundaries of the simplex plot and confirming the rapid adaptation shown by the  
220 GAMMs. Interestingly, the four hypermutator isolates arising in this window do not alone  
221 define the trait boundaries of the AA; other normo-mutator isolates are located in equal  
222 proximity to the “evolved” archetypes (Figure 4D, full dataset in Figure S1).

223

224 To evaluate whether the rapid phenotypic adaptation occurred in parallel with genetic  
225 adaptation, we investigated the accumulation of nonsynonymous mutations (Figure 4D-E).  
226 We used the isolates representing the first *P. aeruginosa* culture from a patient as the  
227 reference point for identification of accumulating mutations. Using AA, we observed that  
228 most of the first isolates with 0-30 mutations aligned with “naïve” archetypes, and 2-3-year-  
229 old isolates with 9-48 mutations extended to the outer boundaries of adaptation (A2, A6,  
230 and A1) (Figure 4C-D). However, we also observed the persistence of WT-like genotypes  
231 with few mutations alongside evolved genotypes (Figure 4D). When analyzing the entire  
232 dataset using GAMMs, we found a significant, near-linear relationship between colonization  
233 time and the number of non-synonymous SNPs, but this near-linear trend was not present  
234 when evaluating the total number of mutations (Figure 4E). We theorize that this difference  
235 is driven by the apparent logarithmic accumulation of indels, where indel accumulation  
236 appears to slow around year 2 of colonization as shown in Figure 4E.

237

### 238 **Multi-trait analysis enables complex genotype-phenotype associations**

239 The obscuring of genotype-phenotype links via polygenic mutations and their pleiotropic  
240 effects is rarely easy to deconvolute. As our models are unbiased by any genetic  
241 information, we have a unique perspective from which to map genotype-phenotype  
242 relationships. We previously identified 52 “pathoadaptive genes”, which are genes mutated  
243 more often than expected from genetic drift and thus are assumed to confer an adaptive  
244 advantage during infection (Marvig et al., 2015; Sokurenko et al., 1999). By overlaying



245 nonsynonymous mutations on AA simplex plots, we evaluated mutation impacts on the  
246 following pathoadaptive genes: 1) top ranked *mexZ* and other repressors of drug efflux  
247 pumps (*nfxB/nalD*), 2) mucoidity regulators *mucA/algU* and the hypothesized infection-state  
248 switching *retS/gacAS/rsmA* regulatory pathway which we previously examined from a  
249 genetic adaptation perspective (Goodman et al., 2004; Marvig et al., 2015), and 3)  
250 quinolone resistance genes *gyrA/gyrB* (Kugelberg et al., 2005; Nakamura et al., 1989;  
251 Robillard and Scarpa, 1988) given the rapid adaptation of ciprofloxacin susceptibility. We  
252 saw no obvious spatial correlations with mutations linked to mucoidity regulation in the AA  
253 model (Figure S2) which parallels mucoidity's lack of significance in our GAMM analyses.  
254 Isolates with *mexZ* mutations are prevalent and also distributed throughout the simplex  
255 plot, so we analyzed *mexZ* mutants in combination with other pump repressor gene  
256 mutations. We found that even double-mutant isolates grouped by their effect on different  
257 pairings of efflux pumps showed diverse phenotypes via AA, though we noted a unique  
258 distribution of the many isolates impacted by a mutation in *nfxB* (Figure S3, Figure 5B). The  
259 isolate distributions of *gyrA/B* and *retS/gacAS/rsmA* mutants were also striking in their  
260 spatial segregation according to AA (Figure 5A-B).

261  
262 *Ciprofloxacin resistance genes.* The primary drivers of ciprofloxacin resistance in *P.*  
263 *aeruginosa* are theorized to be mutations in drug efflux pump repressor *nfxB* and mutations  
264 in *gyrA* and *gyrB* encoding the two gyrase subunits of the DNA replication system (Kugelberg  
265 et al., 2005; Nakamura et al., 1989; Robillard and Scarpa, 1988). We would therefore expect  
266 isolates with mutations in these resistance genes to cluster around archetypes A1 and A6,  
267 which are characterized by high ciprofloxacin minimal inhibitory concentrations (MICs)  
268 (Figure 3C). However, AA illustrates a much broader distribution of *gyrA/B* mutants among  
269 archetypes, and a third distinct distribution of *nfxB* mutants (Figure 5A-B, left panel). In  
270 association with this AA diversity, we see a range of ciprofloxacin resistance levels  
271 associated with affected isolates both across and within patient lineages, and no dominant  
272 mutations/mutated regions which repeat across lineages (Figure 5A-B, right panel). The  
273 incidence of resistance due to these distinct mechanisms was equal at 78% of affected  
274 isolates (54 out of 69 resistant gyrase mutants vs 37 out of 47 resistant *nfxB* mutants based  
275 on the European Committee on Antimicrobial Susceptibility Testing (EUCAST) breakpoint).  
276 However, the persistence of these respective mutations in affected lineages was dissimilar.

277 Generally, *nfxB* mutation occurred earlier in lineage evolution and persisted in far fewer  
278 lineages compared to *gyrA/B* mutations, which likely contributes to *nfxB*'s band-like  
279 distribution via AA compared to the broader distribution of gyrase mutants towards  
280 adapted archetypes.

281

282 Interestingly, when we further consider the gyrase-mutated isolate plot, we also see that  
283 isolates with a *gyrB* mutation (33 isolates alone or 14 in concert with *gyrA*) are concentrated  
284 closer to "biofilm-linked" archetypes A2 and A4 than isolates with only a *gyrA* mutation (33  
285 isolates). This positive association of *gyrB* on adhesion was confirmed by GAMM, but when  
286 evaluating it by moving the two SNPs affecting the most isolates in both *gyrA* and *gyrB* (2  
287 lineages each, Figure S4) into a laboratory *P. aeruginosa* strain (PAO1), we did not find the  
288 same association (Figure S5-6) (p-values > 0.05, ANOVA with Tukey correction,  
289  $F(4,10)=0.233$ ). We then evaluated the presence of co-occurring mutations in biofilm-linked  
290 genes in the *gyrB*-mutated lineages. In all but one lineage, there was no obvious genetic  
291 explanation for the increased adhesion. Ultimately, this genotype-phenotype link was  
292 indecipherable due to the complexity of mutation patterns and the multi-genetic signature  
293 of biofilm regulation (Wolska et al., 2016).

294

295 *retS/gacAS/rsmA*. The functional model of the *retS/gacA/gacS/rsmA* regulatory system is a  
296 "bimodal" switch between acute and chronic infection phenotypes (Goodman et al., 2004;  
297 Ventre et al., 2006). Posttranscriptional regulator *rsmA* activates an acute infection  
298 phenotype characterized by planktonic growth and inhibits a non-motile "biofilm" lifestyle.  
299 *retS* mutants are preserved in many lineages because they repress *rsmA* via the *gacA/S* two-  
300 component system and thus promote a chronic infection phenotype. However, our previous  
301 genetic analysis (Marvig et al., 2015) unexpectedly showed that multiple evolving lineages  
302 gained a subsequent mutation in *gacA/S* that at times appeared years after the *retS*  
303 mutation. Despite the complexity of this regulatory system, we show a clear phenotypic  
304 separation between clinical isolates that are *retS* mutants versus *retS+gacA/S* mutants via  
305 our AA model (Figure 5C, left panel). In this study, three of eight patients with  
306 nonsynonymous mutations in this system have isolates which are *retS+gacA/S* double  
307 mutants (Figure 5C, right panel). While *retS* mutants resemble more "evolved" archetypes  
308 (A1 – 2 and A6), all but one isolate clusters around the "naïve" archetypes (A3 – A5).

309 According to patient-specific trajectories, this reversion happens after an initial migration  
310 towards “evolved” archetypes. Because of the low sampling number and because we only  
311 see double mutants in three patients, we did not follow up with additional GAMM analyses  
312 of the effect of these mutations on different phenotypes.

313

#### 314 **Infections persist via distinct routes of adaptation**

315 As our trait associations with specific mutations highlight the importance of lineage-based  
316 analysis, we here further investigate lineage influences by mapping patient-specific adaptive  
317 trajectories, which may present clinically useful information for treatment management. By  
318 performing a patient-specific analysis using AA, we find that *P. aeruginosa* infections can  
319 persist successfully in individual patients despite different phenotypic starting points (A3-5)  
320 and/or end points (A1, 2, and 6). Figure 6A-C shows three adapting lineages that follow  
321 distinct trajectories and each persist for at least three years in a patient, while Figure 6D  
322 shows a patient with diverse isolates that do not appear to follow a clear adaptive  
323 trajectory. In both Figure 6A and C, we see a rapid evolution towards an endpoint of  
324 ciprofloxacin resistance. In Figure 6A, the colonization initiates with two isolates, but we  
325 determined that the isolate near A4 is genotypically distinct from the remaining 11 isolates  
326 of that lineage based on mutational differences. The persisting sublineage seems to initiate  
327 with the isolate near A3, after which it gains a *gyrB* mutation that guides the trajectory  
328 towards A1 and subsequent mutations then push the lineage phenotype towards A2,  
329 characterized by increased adherence and decreased sensitivity to aztreonam. This  
330 trajectory towards A2 is also seen in Figure 6B, which begins as a broad band of isolates  
331 moving from A3/A4 towards A2/A6. However, the isolates seem directed towards A2 rather  
332 than A6 or a mix thereof over infection. These results illustrate the diverse adaptive  
333 trajectories followed by *P. aeruginosa* in our patient cohort, which connect distinct start and  
334 endpoints of adaptation yet enable years of persistence.

335

336 In summary, the results of our investigations together illustrate how a multi-trait analysis  
337 perspective can identify unique emergent characteristics of evolving bacteria, but also  
338 highlight the strong influence of lineage-specific trajectories, the historic contingency of  
339 mutations, and the impact it can have on the phenotypes expressed.

340

## 341 DISCUSSION

342 By integrating phenotypic and molecular characterizations of our unique isolate collection  
343 with well-suited data modeling, we illuminate specific evolutionary priorities in early  
344 infection. We overcome remarkable genetic and phenotypic diversity to 1) observe rapid  
345 early adaptation and its discordance with genetic adaptation, 2) associate novel phenotypes  
346 with pathoadaptive genes, and 3) retrieve meaningful mappings of distinct patient-specific  
347 trajectories. Phenotypic traits represent systems-level impacts of many different molecular  
348 markers and are shown in this study to adapt along parallel evolutionary paths. We  
349 therefore propose a “new” model of investigation or, more appropriately, we re-emphasize  
350 the value of classical phenotype-based investigations. Specifically, instead of focusing on  
351 genetic readouts of adaptation, where a specific mutation or gene may or may not be  
352 consistently linked with a specific phenotype; we suggest that mapping changes of carefully  
353 selected traits provides a better basis for predictions of the next steps of colonization and  
354 infection. Here, we specifically use clinically feasible phenotypic screens, modeling and  
355 visualization methods to evaluate trait adaptation, and map patient-specific evolutionary  
356 trajectories with the potential for integration with clinical diagnostics.

357

358 We deconvolute pathogen evolution in the host by a unique integration of methods.  
359 Previous studies employed linear mixed models of phenotypic adaptation (Andersen et al.,  
360 2015), and employed archetype analysis in the comparison of features of transcriptomic  
361 adaptation by *P. aeruginosa* (Thøgersen et al., 2013), and most recently, prediction of the  
362 polymorphism structure in a population based on evolutionary trade-offs in a multi-trait  
363 fitness landscape (Sheftel et al., 2018). However, by integrating the two approaches, we  
364 illuminate complex patterns and facilitate the deconvolution of trait adaptation to decipher  
365 the major evolutionary highways in our patient cohort. For example, we do not see  
366 significant cross-patient selection for adherence using GAMMs, but we see selection for  
367 adherence in a few specific patients via AA. That this is not a major trend in our data is  
368 surprising when we consider that a biofilm lifestyle is expected to be beneficial to  
369 persistence in chronically infected patients (Bjarnsholt et al., 2009; Cohen-Cymerknoh et  
370 al., 2011; Høiby, 2002; Pressler et al., 2011). However, it leads us to hypothesize that the

371 rate of adaptation and relative benefit of this phenotype may vary significantly and be more  
372 sensitive to temporal stresses such as antibiotic treatment. In support of our findings, others  
373 have recently shown that the longitudinal relationship between mucoidity and a clinical  
374 diagnosis of chronic infection is not as direct as previously expected (Heltshe et al., 2017).  
375 Together, these results prompt further reassessment of common assumptions regarding the  
376 evolutionary objectives of *P. aeruginosa* in CF infections.

377

378 We map remarkable evolutionary dynamics in the early stages of patient colonization,  
379 where we estimate the initial window of rapid adaptation to be within 5256 - 7884 bacterial  
380 generations (Yang et al., 2008). While the first isolate of each patient in our collection may  
381 not represent the true start of adaptation given sampling limitations, we see general  
382 alignment of our “first” isolates via archetype distribution; the window of rapid adaptation  
383 is therefore still likely substantially contracted compared to the previous estimate of within  
384 42,000 generations (Yang et al., 2011). In fact, our data resembles the rate of fitness  
385 improvement found in the laboratory evolution study of *E. coli*, which was shown to change  
386 significantly within the first 5,000-10,000 generations (Barrick et al., 2009; Woods et al.,  
387 2011). With regards to the corresponding genetic adaptation during this period, the cross-  
388 patient trend fit by GAMMs reflects an expected accumulation of mutations over time.  
389 However, AA demonstrates patient-specific differences; specific lineages show different  
390 numbers of mutations after having adapted over 2-3 years (with a range of 9-48 mutations,  
391 not including hypermutators). Furthermore, the isolates with the highest numbers of  
392 mutations, the hypermutators, do not define the boundaries of phenotypic adaptation,  
393 which supports the idea that molecular and phenotypic adaptation can be discordant. Select  
394 beneficial mutations (for example, a highly impactful indel) can alone induce important  
395 phenotypic changes that improve fitness, especially via pleiotropic effects (Solovieff et al.,  
396 2013) in accordance with the theory that the likelihood of beneficial mutations decreases  
397 over time (Desai and Fisher, 2007). Our logarithmic gain of indels replicates the findings of  
398 the laboratory evolution study of *E. coli* which has been propagating for more than 60,000  
399 generations (Good et al., 2017). This observation suggests that other methods of adaptation  
400 may contribute in equal degree to adaptation via mutation, such as acclimation to the CF  
401 lung environment via gene expression changes (Dötsch et al., 2015; Rossi et al., 2018).

402

403 Our study highlights important limitations to genotype-phenotype associations and  
404 underlines the usefulness of a multi-trait perspective; individual mutations may have  
405 pleiotropic effects and obscure genetic signatures as they accumulate over time. For  
406 example, we show an unexpected phenotypic reversion to an “acute infection state” via  
407 historically contingent mutations in the *retS/gacAS/rsmA* system. This does not easily  
408 reconcile with theories about preservation of a persistent colonization via convergence  
409 towards a “chronic phenotype”. However, over time some patients are colonized by new  
410 clone types and/or other pathogens; this could require re-establishment of a colonization  
411 mid-infection and thus induce the population to revert towards an acute infection state  
412 where fast growth and motility improve its ability to compete. In evaluating primary  
413 ciprofloxacin resistance genes *nfxB* and *gyrA/B*, we see substantial diversity in ciprofloxacin  
414 susceptibility for isolates which share the same mutation, unique mutations fixing in each  
415 lineage, and differential extents of adaptation boundaries using AA. This last observation led  
416 us to note that *nfxB*-mutated isolates are associated with earlier incidence and more limited  
417 lineage persistence versus isolates with *gyrA/B* mutations. This may be caused by a  
418 differential fitness impact of *nfxB* mutation that limits tolerance of this mutation to a  
419 narrower range of genotypic backgrounds than that of *gyrA/B* mutation, or it could be  
420 associated with differential treatment regimens that influence the relative benefit of a given  
421 ciprofloxacin resistance mechanism; further study is required to tease out these  
422 mechanisms by both evaluating patient treatment histories and adding additional lineages  
423 to the study. We also discovered an association between *gyrB* mutation and increased  
424 adhesion; to our knowledge, there is no direct link between *gyrB* and the capability to  
425 adhere (Kugelberg et al., 2005) and we did not see increased adhesion in our engineered  
426 *gyrB* mutants. It is possible that a mutation in *gyrB* enables or is simply more tolerant of  
427 other specific mutations that result in increased adhesion in comparison with *gyrA*  
428 mutation. In general, our results support the theory that specific mutations confer unique  
429 evolutionary restrictions to adaptive trajectories that impact other traits, but genetic  
430 background and host-specific evolutionary pressures influence the type and degree of  
431 restriction. This process could underpin the diversity of phenotypic adaptation we observe  
432 in this study.  
433

434 Complex mutation patterns are an inherent byproduct of evolution and result in equally  
435 complex, varied adaptive trajectories that lead to persistence. Clinicians need improved  
436 methods to predict and prevent the transition from colonization to persistent and chronic  
437 infection. We see particular promise in incorporating records of patient treatment and  
438 response to our assessment of adaptive trajectories to further guide clinicians in patient-  
439 tailored treatment management. At the moment, our models can assist by illustrating  
440 distinct evolutionary highways to pathogen persistence in individual patients. In this study,  
441 we find 3 overarching modes of evolution: 1) directed diversity, where a given patient's  
442 trajectory is characterized by diverse isolates moving in the same general direction such as  
443 increased adhesion and aggregation (Figure 6B) (Andersen et al., 2015), 2) convergent  
444 evolution, where the adaptation is constrained by strong selective pressures driving the  
445 phenotypic change in one particular direction such as resistance to ciprofloxacin (Figure 6C)  
446 (Imamovic et al., 2018), or 3) general diversity, where colonization appears to initiate with  
447 diverse "naïve" isolates and this diversity is maintained or expanded with no interpretable  
448 adaptive trajectory over time (Figure 6D). We theorize that these evolutionary modes and  
449 their dynamics may correlate with infection persistence and patient outcomes.

450

451 In conclusion, our study identifies rapid adaptation of isolates by both mutational  
452 accumulation and acclimation within the first few years of colonization. While specific traits  
453 show cross-patient convergence, we also highlight remarkable diversity both within and  
454 across patients, emphasizing the maintenance of diversity as a useful mode of persistence.  
455 We identify unique highways of evolution that are used by pathogens to persist in the lungs.  
456 By mapping these phenotypic trajectories, we can identify both genetic mechanisms that  
457 regulate these highways and complex traits that signal the impact of treatment on individual  
458 infections.

## 459 ACKNOWLEDGMENTS

460 HKJ was supported by The Novo Nordisk Foundation as a clinical research stipend  
461 (NNF12OC1015920), by Rigshospitalets Rammebevilling 2015-17 (R88-A3537), by  
462 Lundbeckfonden (R167-2013-15229), by Novo Nordisk Fonden (NNF15OC0017444), by  
463 RegionH Rammebevilling (R144-A5287) and by Independent Research Fund Denmark /

464 Technology and Production Sciences (FTP-4183-00051). JAB was funded by a postdoctoral  
465 fellowship from the Whitaker Foundation. LMS ... SM ...

466 We thank Katja Bloksted, Ulla Rydahl Johansen, Helle Nordbjerg Andersen, Sarah Buhr  
467 Bendixen, Camilla Thranow, Pia Poss, Bonnie Horsted Erichsen, Rakel Schiøtt and Mette  
468 Pedersen for excellent technical assistance. We also thank Prof. Anders Stockmarr, Prof.  
469 Nina Jakobsen and Prof. Morten Mørup (DTU Compute) and Dr. Kevin D’Auria (Counsyl) for  
470 helpful discussions.

471

## 472 AUTHOR CONTRIBUTIONS

473 SM and HKJ jointly supervised the study. JAH, SM, and HKJ conceived and designed the  
474 experiments. JAH performed all phenotypic screening with assistance from AL. REP  
475 performed the genetic engineering of isolate mutations. JAB and LMS conceived and  
476 performed all computational analysis and wrote the manuscript. JAH, SM and HKJ helped  
477 write the manuscript and provided revisions.

478

## 479 DECLARATION OF INTERESTS

480 The authors declare no competing financial interests.

481

## 482 REFERENCES

483 Andersen, S.B., Marvig, R.L., Molin, S., Krogh Johansen, H., and Griffin, A.S. (2015). Long-  
484 term social dynamics drive loss of function in pathogenic bacteria. *Proc. Natl. Acad. Sci. U. S.*  
485 *A. 112*, 10756–10761.

486 Aparicio, T., de Lorenzo, V., and Martínez-García, E. (2018). CRISPR/Cas9-Based  
487 Counterselection Boosts Recombineering Efficiency in *Pseudomonas putida*. *Biotechnol. J.*  
488 *13*, 1700161.

489 Arnold, J.B. (2017). ggthemes: Extra Themes, Scales and Geoms for ‘ggplot2.’

490 Barrick, J.E., Yu, D.S., Yoon, S.H., Jeong, H., Oh, T.K., Schneider, D., Lenski, R.E., and Kim, J.F.  
491 (2009). Genome evolution and adaptation in a long-term experiment with *Escherichia coli*.

492 *Nature 461*, 1243–1247.



493 Bjarnsholt, T., Jensen, P.Ø., Fiandaca, M.J., Pedersen, J., Hansen, C.R., Andersen, C.B.,  
494 Pressler, T., Givskov, M., and Høiby, N. (2009). *Pseudomonas aeruginosa* biofilms in the  
495 respiratory tract of cystic fibrosis patients. *Pediatr. Pulmonol.* *44*, 547–558.

496 Caceres, S.M., Malcolm, K.C., Taylor-Cousar, J.L., Nichols, D.P., Saavedra, M.T., Bratton, D.L.,  
497 Moskowitz, S.M., Burns, J.L., and Nick, J.A. (2014). Enhanced in vitro formation and  
498 antibiotic resistance of nonattached *Pseudomonas aeruginosa* aggregates through  
499 incorporation of neutrophil products. *Antimicrob. Agents Chemother.* *58*, 6851–6860.

500 Cohen-Cymberknoh, M., Shoseyov, D., and Kerem, E. (2011). Managing cystic fibrosis:  
501 Strategies that increase life expectancy and improve quality of life. *Am. J. Respir. Crit. Care*  
502 *Med.* *183*, 1463–1471.

503 Desai, M.M., and Fisher, D.S. (2007). Beneficial mutation selection balance and the effect of  
504 linkage on positive selection. *Genetics* *176*, 1759–1798.

505 Déziel, E., Comeau, Y., and Villemur, R. (2001). Initiation of biofilm formation by  
506 *Pseudomonas aeruginosa* 57RP correlates with emergence of hyperpiliated and highly  
507 adherent phenotypic variants deficient in swimming, swarming, and twitching motilities. *J.*  
508 *Bacteriol.* *183*, 1195–1204.

509 Dötsch, A., Schniederjans, M., Khaledi, A., Hornischer, K., Schulz, S., Bielecka, A., Eckweiler,  
510 D., Pohl, S., and Häussler, S. (2015). The *Pseudomonas aeruginosa* Transcriptional Landscape  
511 Is Shaped by Environmental Heterogeneity and Genetic Variation. *MBio* *6*, e00749.

512 Eugster, M.J.A., and Leisch, F. (2009). From Spider-Man to Hero - Archetypal Analysis in R. *J.*  
513 *Stat. Softw.* *30*, 1–23.

514 Eugster, M.J.A., and Leisch, F. (2011). Weighted and robust archetypal analysis. *Comput.*  
515 *Stat. Data Anal.* *55*, 1215–1225.

516 Fernandez, M., Wilson, H.F., and Barnard, A.S. (2017). Impact of distributions on the  
517 archetypes and prototypes in heterogeneous nanoparticle ensembles. *Nanoscale* *9*, 832–  
518 843.

519 Flores-Mireles, A.L., Walker, J.N., Caparon, M., and Hultgren, S.J. (2015). Urinary tract  
520 infections: Epidemiology, mechanisms of infection and treatment options. *Nat. Rev.*  
521 *Microbiol.* *13*, 269–284.

522 Good, B.H., McDonald, M.J., Barrick, J.E., Lenski, R.E., and Desai, M.M. (2017). The dynamics  
523 of molecular evolution over 60,000 generations. *Nature* *551*, 45–50.

524 Goodman, A.L., Kulasekara, B., Rietsch, A., Boyd, D., Smith, R.S., and Lory, S. (2004). A

525 Signaling Network Reciprocally Regulates Genes Associated with Acute Infection and  
526 Chronic Persistence in *Pseudomonas aeruginosa*. *Dev. Cell* 7, 745–754.

527 Hansen, C.R., Pressler, T., and Høiby, N. (2008). Early aggressive eradication therapy for  
528 intermittent *Pseudomonas aeruginosa* airway colonization in cystic fibrosis patients: 15  
529 years experience. *J. Cyst. Fibros.* 7, 523–530.

530 Hansen, S.K., Rau, M.H., Johansen, H.K., Ciofu, O., Jelsbak, L., Yang, L., Folkesson, A., Jarmer,  
531 H.Ø., Aanæs, K., von Buchwald, C., et al. (2012). Evolution and diversification of  
532 *Pseudomonas aeruginosa* in the paranasal sinuses of cystic fibrosis children have  
533 implications for chronic lung infection. *ISME J.* 6, 31–45.

534 Heltshe, S.L., Khan, U., Beckett, V., Baines, A., Emerson, J., Sanders, D.B., Gibson, R.L.,  
535 Morgan, W., and Rosenfeld, M. (2017). Longitudinal development of initial, chronic and  
536 mucoid *Pseudomonas aeruginosa* infection in young children with cystic fibrosis. *J. Cyst.*  
537 *Fibros.*

538 Hentzer, M., Teitzel, G.M., Balzer, G.J., Heydorn, A., Molin, S., Givskov, M., and Parsek, M.R.  
539 (2001). Alginate overproduction affects *Pseudomonas aeruginosa* biofilm structure and  
540 function. *J. Bacteriol.* 183, 5395–5401.

541 Høiby, N. (2002). Understanding bacterial biofilms in patients with cystic fibrosis: current  
542 and innovative approaches to potential therapies. *J. Cyst. Fibros.* 1, 249–254.

543 Imamovic, L., Ellabaan, M.M.H., Dantas Machado, A.M., Citterio, L., Wulff, T., Molin, S.,  
544 Krogh Johansen, H., and Sommer, M.O.A. (2018). Drug-Driven Phenotypic Convergence  
545 Supports Rational Treatment Strategies of Chronic Infections. *Cell* 172, 121–134.e14.

546 Jansson, J.K., and Baker, E.S. (2016). A multi-omic future for microbiome studies. *Nat.*  
547 *Microbiol.* 1, 16049.

548 Jansson, J.K., and Hofmockel, K.S. (2018). The soil microbiome — from metagenomics to  
549 metaphenomics. *Curr. Opin. Microbiol.* 43, 162–168.

550 Jiricny, N., Molin, S., Foster, K., Diggle, S.P., Scanlan, P.D., Ghoul, M., Johansen, H.K.,  
551 Santorelli, L.A., Popat, R., West, S.A., et al. (2014). Loss of Social Behaviours in Populations  
552 of *Pseudomonas aeruginosa* Infecting Lungs of Patients with Cystic Fibrosis. *PLoS One* 9,  
553 e83124.

554 Johansen, H.K., Moskowitz, S.M., Ciofu, O., Pressler, T., and Høiby, N. (2008). Spread of  
555 colistin resistant non-mucoid *Pseudomonas aeruginosa* among chronically infected Danish  
556 cystic fibrosis patients. *J. Cyst. Fibros.* 7, 391–397.

557 Johansen, H.K., Aanaes, K., Pressler, T., Nielsen, K.G., Fisker, J., Skov, M., Høiby, N., and von  
558 Buchwald, C. (2012). Colonisation and infection of the paranasal sinuses in cystic fibrosis  
559 patients is accompanied by a reduced PMN response. *J. Cyst. Fibros.* *11*, 525–531.

560 Jorth, P., Staudinger, B.J., Wu, X., Hisert, K.B., Hayden, H., Garudathri, J., Harding, C.L.,  
561 Radey, M.C., Rezayat, A., Bautista, G., et al. (2015). Regional Isolation Drives Bacterial  
562 Diversification within Cystic Fibrosis Lungs. *Cell Host Microbe* *18*, 307–319.

563 Kline, K.A., and Bowdish, D.M.E. (2016). Infection in an aging population. *Curr. Opin.*  
564 *Microbiol.* *29*, 63–67.

565 Kragh, K.N., Hutchison, J.B., Melaugh, G., Rodesney, C., Roberts, A.E.L., Irie, Y., Jensen, P.Ø.,  
566 Diggle, S.P., Allen, R.J., Gordon, V., et al. (2016). Role of Multicellular Aggregates in Biofilm  
567 Formation. *MBio* *7*, e00237.

568 Kugelberg, E., Löfmark, S., Wretling, B., and Andersson, D.I. (2005). Reduction of the fitness  
569 burden of quinolone resistance in *Pseudomonas aeruginosa*. *J. Antimicrob. Chemother.* *55*,  
570 22–30.

571 Lieberman, T.D., Flett, K.B., Yelin, I., Martin, T.R., McAdam, A.J., Priebe, G.P., and Kishony, R.  
572 (2014). Genetic variation of a bacterial pathogen within individuals with cystic fibrosis  
573 provides a record of selective pressures. *Nat. Genet.* *46*, 82–87.

574 López-Causapé, C., Sommer, L.M., Cabot, G., Rubio, R., Ocampo-Sosa, A.A., Johansen, H.K.,  
575 Figuerola, J., Cantón, R., Kidd, T.J., Molin, S., et al. (2017). Evolution of the *Pseudomonas*  
576 *aeruginosa* mutational resistome in an international Cystic Fibrosis clone. *Sci. Rep.* *7*.

577 Markussen, T., Marvig, R.L., Gómez-Lozano, M., Aanaes, K., Burleigh, A.E., Høiby, N.,  
578 Johansen, H.K., Molin, S., and Jelsbak, L. (2014). Environmental heterogeneity drives within-  
579 host diversification and evolution of *Pseudomonas aeruginosa*. *MBio* *5*, e01592-14.

580 Marvig, R.L., Johansen, H.K., Molin, S., and Jelsbak, L. (2013). Genome Analysis of a  
581 Transmissible Lineage of *Pseudomonas aeruginosa* Reveals Pathoadaptive Mutations and  
582 Distinct Evolutionary Paths of Hypermutators. *PLoS Genet.* *9*, e1003741.

583 Marvig, R.L., Sommer, L.M., Molin, S., and Johansen, H.K. (2015). Convergent evolution and  
584 adaptation of *Pseudomonas aeruginosa* within patients with cystic fibrosis. *Nat. Genet.* *47*.

585 May, M. (2014). Drug development: Time for teamwork. *Nature* *509*, S4–S5.

586 Mørup, M., and Hansen, L.K. (2012). Archetypal analysis for machine learning and data  
587 mining. *Neurocomputing* *80*, 54–63.

588 Nakamura, S., Nakamura, M., Kojima, T., and Yoshida, H. (1989). *gyrA* and *gyrB* mutations in

589 quinolone-resistant strains of *Escherichia coli*. *Antimicrob. Agents Chemother.* *33*, 254–255.

590 O'Neill, J. (2016). Tackling drug-resistant infections globally: Final report and  
591 recommendations. <https://Amr-Review.Org/>.

592 O'Toole, G.A., and Kolter, R. (1998). Flagellar and twitching motility are necessary for  
593 *Pseudomonas aeruginosa* biofilm development. *Mol. Microbiol.* *30*, 295–304.

594 Pedersen, S.S., Høiby, N., Espersen, F., and Koch, C. (1992). Role of alginate in infection with  
595 mucoid *Pseudomonas aeruginosa* in cystic fibrosis. *Thorax* *47*, 6–13.

596 Pressler, T., Bohmova, C., Conway, S., Dumcius, S., Hjelte, L., Høiby, N., Kollberg, H.,  
597 Tümmler, B., and Vavrova, V. (2011). Chronic *Pseudomonas aeruginosa* infection definition:  
598 EuroCareCF Working Group report. *J. Cyst. Fibros.* *10*, S75–S78.

599 Rau, M.H., Hansen, S.K., Johansen, H.K., Thomsen, L.E., Workman, C.T., Nielsen, K.F., Jelsbak,  
600 L., Høiby, N., Yang, L., and Molin, S. (2010). Early adaptive developments of *Pseudomonas*  
601 *aeruginosa* after the transition from life in the environment to persistent colonization in the  
602 airways of human cystic fibrosis hosts. *Environ. Microbiol.* *12*, 1643–1658.

603 Ricaurte, D.E., Martínez-García, E., Nyerges, Á., Pál, C., de Lorenzo, V., and Aparicio, T.  
604 (2018). A standardized workflow for surveying recombinases expands bacterial genome-  
605 editing capabilities. *Microb. Biotechnol.* *11*, 176–188.

606 van Rij, J., Wieling, M., Baayen, R.H., and van Rijn, H. (2017). *itsadug*: Interpreting Time  
607 Series and Autocorrelated Data Using GAMMs.

608 Robillard, N.J., and Scarpa, A.L. (1988). Genetic and physiological characterization of  
609 ciprofloxacin resistance in *Pseudomonas aeruginosa* PAO. *Antimicrob. Agents Chemother.*  
610 *32*, 535–539.

611 Rossi, E., Falcone, M., Molin, S., and Johansen, H.K. (2018). High-resolution in situ  
612 transcriptomics of *Pseudomonas aeruginosa* unveils genotype independent patho-  
613 phenotypes in cystic fibrosis lungs. Submitted.

614 Ryder, C., Byrd, M., and Wozniak, D.J. (2007). Role of polysaccharides in *Pseudomonas*  
615 *aeruginosa* biofilm development. *Curr. Opin. Microbiol.* *10*, 644–648.

616 Seth, S., and Eugster, M.J.A. (2014). Probabilistic Archetypal Analysis.

617 Seth, S., and Eugster, M.J.A. (2016). Probabilistic archetypal analysis. *Mach. Learn.* *102*, 85–  
618 113.

619 Sheftel, H., Szekely, P., Mayo, A., Sella, G., and Alon, U. (2018). Evolutionary trade-offs and  
620 the structure of polymorphisms. *Philos. Trans. R. Soc. Lond. B. Biol. Sci.* *373*, 20170105.

621 Silva, I.N., Santos, P.M., Santos, M.R., Zlosnik, J.E.A., Speert, D.P., Buskirk, S.W., Brugger, E.L.,  
622 Waters, C.M., Cooper, V.S., and Moreira, L.M. (2016). Long-Term Evolution of *Burkholderia*  
623 *multivorans* during a Chronic Cystic Fibrosis Infection Reveals Shifting Forces of Selection.  
624 *MSystems* 1, e00029-16.

625 Smith, E.E., Buckley, D.G., Wu, Z., Saenphimmachak, C., Hoffman, L.R., D'Argenio, D.A.,  
626 Miller, S.I., Ramsey, B.W., Speert, D.P., Moskowitz, S.M., et al. (2006). Genetic adaptation by  
627 *Pseudomonas aeruginosa* to the airways of cystic fibrosis patients. *Proc. Natl. Acad. Sci. U. S.*  
628 *A.* 103, 8487–8492.

629 Sokurenko, E. V, Hasty, D.L., Dykhuizen, D.E., Sokurenko, E. V., Hasty, D.L., Dykhuizen, D.E.,  
630 Sokurenko, E. V., Hasty, D.L., and Dykhuizen, D.E. (1999). Pathoadaptive mutations: gene  
631 loss and variation in bacterial pathogens. *Trends Microbiol.* 7, 191–195.

632 Solovieff, N., Cotsapas, C., Lee, P.H., Purcell, S.M., and Smoller, J.W. (2013). Pleiotropy in  
633 complex traits: challenges and strategies. *Nat. Rev. Genet.* 14, 483–495.

634 Sommer, L.M., Alanin, M.C., Marvig, R.L., Nielsen, K.G., Høiby, N., von Buchwald, C., Molin,  
635 S., and Johansen, H.K. (2016). Bacterial evolution in PCD and CF patients follows the same  
636 mutational steps. *Sci. Rep.* 6, 28732.

637 Team, R.C. (2017). R: A Language and Environment for Statistical Computing.

638 Thøgersen, J., Mørup, M., Damkiær, S., Molin, S., and Jelsbak, L. (2013). Archetypal analysis  
639 of diverse *Pseudomonas aeruginosa* transcriptomes reveals adaptation in cystic fibrosis  
640 airways. *BMC Bioinformatics* 14, 279.

641 Ventre, I., Goodman, A.L., Vallet-Gely, I., Vasseur, P., Soscia, C., Molin, S., Bleves, S.,  
642 Lazdunski, A., Lory, S., and Filloux, A. (2006). Multiple sensors control reciprocal expression  
643 of *Pseudomonas aeruginosa* regulatory RNA and virulence genes. *Proc. Natl. Acad. Sci. U. S.*  
644 *A.* 103, 171–176.

645 Wickham, H. (2017). tidyverse: Easily Install and Load the 'Tidyverse.'

646 Winstanley, C., O'Brien, S., and Brockhurst, M.A. (2016). *Pseudomonas aeruginosa*  
647 Evolutionary Adaptation and Diversification in Cystic Fibrosis Chronic Lung Infections. *Trends*  
648 *Microbiol.* 24, 327–337.

649 Wolska, K.I., Grudniak, A.M., Rudnicka, Z., and Markowska, K. (2016). Genetic control of  
650 bacterial biofilms. *J. Appl. Genet.* 57, 225–238.

651 Wood, S.N. (2006). *Generalized additive models: an introduction with R* (CRC Press).

652 Wood, S.N. (2011). *Fast stable restricted maximum likelihood and marginal likelihood*

653 estimation of semiparametric generalized linear models. *J. R. Stat. Soc. Ser. B (Statistical*  
654 *Methodol.* *73*, 3–36.

655 Wood, S.N. (2013). On p-values for smooth components of an extended generalized additive  
656 model. *Biometrika* *100*, 221–228.

657 Wood, S.N., Pya, N., and Säfken, B. (2016). Smoothing Parameter and Model Selection for  
658 General Smooth Models. *J. Am. Stat. Assoc.* *111*, 1548–1563.

659 Woods, R.J., Barrick, J.E., Cooper, T.F., Shrestha, U., Kauth, M.R., and Lenski, R.E. (2011).  
660 Second-order selection for evolvability in a large *Escherichia coli* population. *Science* *331*,  
661 1433–1436.

662 Xie, Y. (2017). knitr: A General-Purpose Package for Dynamic Report Generation in R.

663 Yachi, S., Loreau, M., and Singh, P.K. (1999). Biodiversity and ecosystem productivity in a  
664 fluctuating environment: the insurance hypothesis. *Proc. Natl. Acad. Sci. U. S. A.* *96*, 1463–  
665 1468.

666 Yang, L., Haagenen, J.A.J., Jelsbak, L., Johansen, H.K., Sternberg, C., Høiby, N., and Molin, S.  
667 (2008). In situ growth rates and biofilm development of *Pseudomonas aeruginosa*  
668 populations in chronic lung infections. *J. Bacteriol.* *190*, 2767–2776.

669 Yang, L., Jelsbak, L., Marvig, R.L., Damkiær, S., Workman, C.T., Rau, M.H., Hansen, S.K.,  
670 Folkesson, A., Johansen, H.K., Ciofu, O., et al. (2011). Evolutionary dynamics of bacteria in a  
671 human host environment. *Proc. Natl. Acad. Sci. U. S. A.* *108*, 7481–7486.

672 Zhu, H. (2017). kableExtra: Construct Complex Table with ‘kable’ and Pipe Syntax.

673

## 674 FIGURE TITLES AND LEGENDS

### 675 [Figure 1. Workflow and study setup.](#)

676 **Upper panel:** Every month, CF patients are seen at the CF clinic at Rigshospitalet in  
677 Copenhagen, Denmark. Here they deliver a sputum or endolaryngeal suction sample where  
678 selective microbiological culturing is performed (Johansen et al., 2008). The longitudinally  
679 collected isolates have been genome sequenced and analyzed in a previous study by Marvig  
680 *et al.* (Marvig et al., 2015). **Middle panel:** Longitudinally collected isolates have been  
681 subjected to different phenotypic analyses for this study and are here (**lower panel**)  
682 analyzed using two data modelling approaches: Archetype Analysis (AA) and Generalized  
683 Additive Mixed Model (GAMM). By integrating these approaches, we map dominant

684 evolutionary trajectories and analyze mechanistic links between phenotypic and genetic  
685 adaptation.

686

### 687 **Figure 2. Phenotypic characterization.**

688 We present **(A)** summary statistics of our phenotype screen as well as compare the **(B)**  
689 expected adaptation over time based on field consensus versus **(C)** a simple evaluation of  
690 our raw measurements by colonization time. After sorting the isolates (x-axis) by the time  
691 since colonization of a specific lineage or “colonization time” (CoIT), it is still difficult to see  
692 consistent patterns of phenotypic change over time. Colors are linked with the expected  
693 change of the specific phenotype (B), so that blue denotes a “naïve” phenotype and red  
694 denotes an “evolved” phenotype. For growth rate (in artificial sputum medium (ASM)),  
695 adhesion, and aggregation, naïve and evolved phenotypes are roughly divided by  
696 comparison with the reference isolate PAO1 phenotype. For aztreonam and ciprofloxacin  
697 MIC, naïve and evolved phenotypes are based on sensitivity or resistance as indicated by  
698 the EUCAST breakpoint values as of March 2017, respectively.

699

### 700 **Figure 3. AA and GAMM models.**

701 We present a summary of the models underpinning our study of pathogen adaptation. **(A)**  
702 Screeplot showing the average residual sum of squares (RSS) for 25 iterations of each fit of a  
703 given number of archetypes. The “elbow” of the plot indicates that six archetypes are  
704 sufficient to model our dataset. **(B)** Characteristic trait profiles describing the 5 distinct  
705 phenotype levels that each of our 6 archetypes represents. We use the following  
706 abbreviations to represent our normalized data: grASM – growth rate in ASM, agg –  
707 Aggregation, adh – Adhesion, azt – aztreonam susceptibility, cip – ciprofloxacin  
708 susceptibility. **(C)** Simplex plot of the AA showing the six archetypes (A1-A6) sorted by their  
709 characteristic growth rate (A3 and A5 vs A2 and A6), decreased sensitivity towards  
710 ciprofloxacin (A1 and A6), and increased aggregation and adhesion (A2 and A4). All further  
711 simplex visualizations are also sorted accordingly and can be interpreted using this key,  
712 which is annotated with the extreme phenotype values for each archetype. The complete  
713 analysis can be found in Supplementary material 1. **(D)** P-values for GAMM models with  
714 multiple explanatory variables (columns) for the six predictor variables (rows), after model

715 reduction. P-values are only shown for explanatory variables that showed a significant ( $p$ -  
716 value $<0.01$ ) impact on the predictor in question. The complete analysis can be found in  
717 Supplementary material 2.

718

#### 719 **Figure 4. Rapid early adaptation.**

720 We present specific GAMM and AA models to illustrate the rapid adaptation of growth rate  
721 and ciprofloxacin over time and contrast these patterns with genetic adaptation via the  
722 accumulation of nonsynonymous mutations. Here, we use GAMMs to illustrate the  
723 significant impact of the explanatory variable colonization time on **(A)** growth rate in ASM,  
724 **(B)** ciprofloxacin sensitivity in ASM, **(E)** the accumulation of all mutations (orange) and  
725 nonsynonymous SNPs (blue) and indels (insertions and deletions). We use simplex  
726 visualizations of AA to show **(C)** “naïve” trait alignment of the first isolate of the twenty  
727 patients where we have analyzed the first *P. aeruginosa* isolate ever cultured at the CF clinic  
728 (blue circles) in contrast to “adapted” isolates that have been cultured at year 2-3 of  
729 colonization (red squares, all patients of the dataset). We contrast this trait-based  
730 ordination with **(D)** genetic adaptation, shown by a color overlay of the number of non-  
731 synonymous mutations present in each isolate. Isolate 95 (purple circle) of the DK12 clone  
732 type has a very high number of mutations ( $>100$ ) because one isolate in that lineage (isolate  
733 96) is very different from the remaining 11 isolates. For the GAMM analysis shown in Figure  
734 4E, we filtered out the mutations from the errant DK12 96 single isolate that affected the  
735 whole lineage. Hypermutators are marked by purple triangles. **(A/B/E notation)** GAMMs are  
736 illustrated by solid smoothed trendlines, dashed two standard error bounds, and gray points  
737 as residuals. Y-axes are labelled by the predictor variable on which the effect of colonization  
738 time of the clone type (“ColT”) has been estimated as well as the estimated degrees of  
739 freedom (edf) (for the E upper panel the edf is ordered as all mutations/NS SNPs). Residuals  
740 have not been plotted in the upper panel of **(E)** for clarity reasons. X-axes are the ColT in  
741 years and patients are included as random smooths together with ColT. A rug plot is also  
742 visible on the x-axis to indicate the density of observations over time.

743



744 **Figure 5. Mechanistic links between phenotypic changes and mutations in**  
745 **ciprofloxacin resistance genes and the *retS/gacAS/rsmA* system.**

746 We use AA to illustrate phenotypic separation by isolates affected by distinct mutations in  
747 ciprofloxacin resistance genes *gyrA*, *gyrB*, and *nfxB* and the *retS/gacAS/rsmA* regulatory  
748 system. **(A-B, left panel)** As visualized by AA simplex plots, the diversity of trait profiles  
749 associated with isolates with mutations in DNA gyrase (*gyrA/B*) is in stark contrast to the  
750 constrained band of *nfxB*-mutated isolates. Mutations in DNA gyrase and *nfxB* do not co-  
751 occur in the same isolate but co-occur in different isolates of 2 lineages (patient P8804,  
752 genotype DK08 and patient P8203, genotype DK32). The differences in time of appearance  
753 during the colonization period and persistence of *gyrA/B* mutant isolates versus *nfxB*  
754 mutant isolates is shown in the lineage timelines plotted in the right column for *gyrA/B* **(A,**  
755 **right panel)** versus *nfxB* **(B, right panel)**. Furthermore, *gyrB*-mutated isolates cluster more  
756 closely with A2 and A4 than *gyrA* mutated isolates, indicating a potential association with  
757 adhesion; GAMMs predicts that *gyrB* mutation has a significant impact on adhesion (GAMM,  
758 p-value << 0.01). **(C, left panel)** Mutations in the *retS/gacAS/rsmA* system shows a clear  
759 phenotypic change when *retS* is mutated alone (blue circles) or in combination with *gacA* or  
760 *gacS* (red squares and circles). The associated lineage plot **(C, right panel)** shows the  
761 appearance of double mutations (*retS* + *gacA/S*) after a colonization period by *retS* mutated  
762 isolates in three patient lineages. **(A/B/C – lineage plot notation)** Lineage length is based on  
763 the span of time for which we have collected isolates and is indicated by gray bracketed  
764 lines, with only isolates affected by a mutation of interest plotted using shape to indicate  
765 mutation type. Symbol color indicates the specific mutation location in the affected gene  
766 and **(A/B only)** symbol size indicates the level of resistance to ciprofloxacin. Multiple  
767 isolates may be collected at the same sampling date based on differences in colony  
768 morphology, which explains the visible vertical overlap of isolates for some lineages.  
769

770 **Figure 6. Evolutionary trajectories guided by different adaptation needs.**

771 We present four different trajectories showing modes of evolution found in multiple  
772 patients: **(A)** A special case of directed evolution with one outlier isolate (isolate 96 of DK12)  
773 but an otherwise clear trajectory first towards ciprofloxacin resistance and afterwards a gain  
774 in adhesive capabilities. **(B)** Diverse early/naïve isolates showing a population moving in a

775 broad and diverse plane from naïve archetypes towards evolved archetypes. **(C)** A  
776 constrained convergence driven primarily by changes of a single phenotypic trait (decreased  
777 ciprofloxacin sensitivity). **(D)** A diverse population with no clear evolutionary trajectory.  
778

## 779 METHODS

### 780 The isolate collection

781 The current isolate library is comprised of 443 longitudinally collected single *P. aeruginosa*  
782 isolates distributed within 52 clone types collected from 39 young CF patients treated at the  
783 Copenhagen CF Centre at Rigshospitalet (median age at first *P. aeruginosa* isolate = 8.1  
784 years, range = 1.4-24.1 years, median coverage of colonization: 4.6 years, range: 0.2-10.2  
785 years). This collection is a complement to and extension of the collection previously  
786 published (Marvig et al., 2015) and captures the period of initial rapid adaptation (Barrick et  
787 al., 2009; Woods et al., 2011; Yang et al., 2011), with 389 isolates of the previously  
788 published collection included here in addition to 54 new isolates. For our study of  
789 phenotypic evolution over time using GAMMs, we only included isolates from clone types  
790 that were capable of creating a persistent mono-clonal colonization or infection, and  
791 therefore two patients with a sustained multi-clonal infection were excluded. However, we  
792 included four patients (P9904, P0405, P5504, and P2204) that show clone type substitution  
793 during the collection period. We also excluded isolates belonging to clone types present in a  
794 patient at two or fewer time-points, unless the two time-points were sampled more than 6  
795 months apart. We also excluded any isolate with any missing phenotype measurement from  
796 our panel of phenotype screens. 389 of the isolates have been clone typed as a part of our  
797 prior phylogenetics study (Marvig et al., 2015) and the remaining isolates have been clone  
798 typed as a step of the routine analysis at the Department of Clinical Microbiology at  
799 Rigshospitalet. This clone type identification was performed as described previously (Marvig  
800 et al., 2015), and the sequencing was carried out as follows: DNA was purified from over-  
801 night liquid cultures of single colonies using the DNEasy Blood and Tissue Kit (Qiagen),  
802 libraries were done with Nextera XT and sequenced on an Illumina MiSeq using the v2  
803 250x2 kit.  
804

## 805 Ethics approval and consent to participate

806 The local ethics committee at the Capital Region of Denmark (Region Hovedstaden)  
807 approved the use of the stored *P. aeruginosa* isolates: registration number H-4-2015-FSP.

808

## 809 Phenotypic characterizations

810 For all phenotypes, four technical replicates were produced for each isolate. For all but the  
811 antibiotic MIC tests, phenotypic analysis was carried out by stabbing from a 96 well plate  
812 pre-frozen with overnight cultures diluted with 50% glycerol at a ratio of 1:1.

813

## 814 Growth rate in Lysogeny broth (LB) and Artificial sputum medium (ASM)

815 Isolates were re-grown from frozen in 96 well plates in 150ul media (LB or ASM) and  
816 incubated for 20h at 37°C with OD<sub>630nm</sub> measurements every 20 min on an ELISA reader.  
817 Microtiter plates were constantly shaking at 150 rpm. LB growth rates were first assessed by  
818 manual fitting of a line to the exponential phase of the growth curve. This dataset was then  
819 used to confirm the accuracy of R code that calculated the fastest growth rate from each  
820 growth curve using a “sliding window” approach where a line was fit to a 3-9 timepoint  
821 interval based on the level of noise in the entire curve (higher levels of noise triggered a  
822 larger window to smooth the fit). To develop an automated method of analyzing the ASM  
823 growth curves, which are much more noisy and irregular than the LB growth curves across  
824 the collection, we used standardized metrics for identifying problematic curves that we then  
825 also evaluated visually. Curves with a maximum OD increase of less than 0.05 were  
826 discarded as non-growing. Curves with linear fits with an R<sup>2</sup> of less than 0.7 were discarded  
827 as non-analyzable, and a small number of outlier curves (defined as curves analyzed for  
828 growth rates of 1.5 times the mean strain growth rate) were also discarded. Examples of our  
829 analyzed curves are shown in Figure S7 and all visualizations are available upon request.

830

## 831 “Adherence” measures

832 The ability to form biofilm is a complex trait that is impacted by multiple factors, such as the  
833 production of polysaccharides, motility, and the ability to adhere (Hentzer et al., 2001;  
834 O’Toole and Kolter, 1998; Ryder et al., 2007). In this study, we have measured adhesion to  
835 peg-lids and estimated the ability to make aggregates – both traits have been linked with an

836 isolate's ability to make biofilm (Déziel et al., 2001; Kragh et al., 2016). Because of this, we  
837 are using these two measures as an estimate of our isolates' ability to make biofilm.  
838 However, because we are aware of the complexity of the actual biofilm-forming phenotype,  
839 we have chosen to refer to this adhesion/aggregation phenotype as "adherence" and not  
840 "biofilm formation".

841

842 *Adhesion in LB.* Adhesion was estimated by measuring attachment to NUNC peg lids.  
843 Isolates were re-grown in 96 well plates with 150µl medium where peg lids were used  
844 instead of the standard plate lids. The isolates were incubated for 20 hours at 37°C, after  
845 which OD<sub>600nm</sub> was measured and subsequently, the peg lids were washed in a "washing  
846 microtiter plate" with 180µl PBS to remove non-adhering cells. The peg lids were then  
847 transferred to a microtiter plate containing 160µl 0.01% crystal violet (CV) and left to stain  
848 for 15 min. The lids were then washed again three times in three individual "washing  
849 microtiter plates" with 180µl PBS to remove unbound crystal violet. To measure the  
850 adhesion, the peg lids were transferred to a microtiter plate containing 180µl 99% ethanol,  
851 causing the adhering CV stained cells to detach from the peg lid. This final plate was used  
852 for measurements using an ELISA reader, measuring the CV density at OD<sub>590nm</sub>. (Microtiter  
853 plates were bought at Fisher Scientific, NUNC Cat no. 167008, peg lids cat no. 445497)

854

855 *Aggregation in ASM.* Aggregation in each well was first screened by visual inspection of  
856 wells during growth assays in LB and ASM and by evaluation of noise in the growth curves,  
857 resulting in a binary metric of "aggregating" versus "not aggregating". However, to  
858 incorporate this trait in our archetype analysis, we needed to develop a continuous metric  
859 of aggregation. Based on the above manual assessment, we developed a metric based on  
860 the average noise of each strain's growth curves. While we tested several different metrics  
861 based on curve variance, the metric that seemed to delineate isolates according to the  
862 binary aggregation measure most successfully was based on a sum of the amount of every  
863 decrease in OD that was followed by a recovery at the next time point (versus the expected  
864 increase in exponential phase and flatline in stationary phase). This value was normalized by  
865 the increase in OD across the whole growth curve, to ensure that significant, irregular  
866 swings stood out with respect to overall growth. This metric therefore specifically accounts  
867 for fluctuation - both a limited number of large fluctuations in OD<sub>630nm</sub> (often seen in ASM

868 during stationary phase) as well as smaller but significant fluctuations across the entire  
869 curve (i.e. sustained irregular growth). While an imperfect assay of aggregation compared to  
870 available experimental methods (Caceres et al., 2014), this high-throughput aggregation  
871 estimate showed a significant relationship with adhesion when analyzed with GAMMs  
872 (Figure 3D), supporting its potential as a measure of adherence-linked behavior. We show  
873 examples of the measurement and comparison with binary aggregation data in Figures S7-8.  
874

#### 875 Protease production

876 Protease activity was determined using 20x20 cm squared LB plates supplemented with  
877 1.5% skim milk. From a “master microtitre plate”, cells were spotted onto the square plate  
878 using a 96 well replicator. Colonies were allowed to grow for 48h at 37°C before protease  
879 activity, showing as a clearing zone in the agar, was read as presence/absence.  
880

#### 881 Mucoidity

882 Mucoidity was determined using 20x20 cm squared LB plates supplemented with 25 ug/ml  
883 ampicillin. From a “master microtitre plate”, cells were spotted onto the square plate using  
884 a 96 well replicator. Colonies were allowed to grow for 48h at 37°C before microscopy of  
885 colony morphologies using a 1.25x air Leica objective. By this visual inspection, it was  
886 determined if a colony was mucoid or non-mucoid.  
887

#### 888 MIC determination of ciprofloxacin and aztreonam

889 MICs were determined by E-tests where a suspension of each isolate (0.5 McFarland  
890 standard) was inoculated on 14 cm-diameter Mueller-Hinton agar plates (State Serum  
891 Institute, Hillerød, Denmark), where after MIC E-Test Strips were placed on the plate in  
892 accordance with the manufacturer’s instructions (Liofilchem®, Italy). The antimicrobial  
893 concentrations of the E-tests were 0.016-256µg/ml for aztreonam and 0.002-32µg/ml for  
894 ciprofloxacin.  
895

#### 896 Construction of *gyrA/B* mutants

897 Four *P. aeruginosa* PAO1 mutants carrying point mutations in *gyrA* and *gyrB* were  
898 constructed: PAO1::*gyrA*<sup>G259A</sup>, PAO1::*gyrA*<sup>C248T</sup>, PAO1::*gyrB*<sup>C1397T</sup>, and PAO1::*gyrB*<sup>G1405T</sup>. A

899 recombineering protocol optimized for *Pseudomonas* was adapted from Ricaurte *et al.*  
900 (2017)(Ricaurte et al., 2018). A PAO1 strain carrying a pSEVA658-ssr plasmid(Aparicio et al.,  
901 2018) expressing the recombinase *ssr* was grown to exponential phase with 250 rpm  
902 shaking at 37°C. Bacteria were then induced with 3-methylbenzoate and electroporated  
903 with recombineering oligonucleotides. Cells were inoculated in 5 ml of glycerol-free Terrific  
904 Broth (TB) and allowed to recover overnight at 37C with shaking. Cip<sup>R</sup> colonies were  
905 identified after streaking on a Cip-LB plate (0.25 mg L<sup>-1</sup>) and sent for sequencing after colony  
906 PCR.

907

908 Each recombineering oligonucleotide contained 45 base pair homology regions flanking the  
909 nucleotide to be edited. Oligonucleotides were designed to bind to the lagging strand of the  
910 replicore of both genes and to introduce the mismatch in each mutation: G259A and  
911 C248T in *gyrA*, and C1937T and G1405T in *gyrB*, respectively. The recombineering  
912 nucleotides used are the following: (Rec\_ *gyrA*\_G259A -  
913 G\*C\*ATGTAGCGCAGCGAGAACGGCTGCGCCATGCGCACGATGGTGTtGTAGACCGCGGTGTCGCC  
914 GTGCGGGTGGTACTTACCGATCACG\*T\*C; Rec\_ *gyrA*\_C248T -  
915 A\*G\*CGAGAACGGCTGCGCCATGCGCACGATGGTGTCTAGACCGCGaTGTCGCCGTGCGGGTGGT  
916 ACTTACCGATCACGTCGCCGACCAC\*A\*C; Rec\_ *gyrB*\_C1397T -  
917 C\*C\*GATGCCACAGCCCAGGGCGGTGATCAGCGTACCGACCTCCTGGaAGGAGAGCATCTTGTCTGA  
918 AGCGCGCCTTTTCGACGTTGAGGAT\*C\*T; Rec\_ *gyrB*\_G1405T  
919 C\*C\*TCGCGGCCGATGCCACAGCCCAGGGCGGTGATCAGCGTACCGAaCTCCTGGGAGGAGAGCAT  
920 CTTGTCTGAAGCGCGCCTTTTCGACG\*T\*T).

921

## 922 Modeling of phenotypic evolution

923 To identify patterns of phenotypic adaptation while limiting necessary model assumptions  
924 that might bias our predictions, we chose to implement generalized additive mixed models  
925 (GAMMs), where the assumptions are that functions are additive and the components are  
926 smooth. These models allow us to account for patient-specific effects, thereby enabling us  
927 to identify trends in phenotypic adaptation across different genetic lineages and different  
928 host environments. Furthermore, to be able to simultaneously assess multiple phenotypes  
929 of each isolate from a systems perspective, we implemented archetype analysis (AA), where

930 each isolate is mapped according to its similarity to extremes, or archetypes, fitted on the  
931 boundaries of the multi-dimensional phenotypic space. This modeling approach allows us to  
932 predict the number and characteristics of these archetypes and furthermore identify  
933 distinctive evolutionary trajectories that emerge from longitudinal analysis of fitted isolates  
934 for each patient.

935

936 For all analyses, the time of infection is defined within each lineage as the time since the  
937 clone type of interest was first discovered in the patient in question. This is biased in the  
938 sense that the time since colonization can only be calculated from the first sequenced  
939 isolate of a patient. However, we have collected and sequenced the first isolate that has  
940 ever been cultured in the clinic for 20 out of the 39 patients.

941

942 Normalization of phenotypic values were carried out the following way for both AA and  
943 GAMM: ciprofloxacin and aztreonam MICs were normalized by dividing the raw MICs with  
944 the breakpoint values from EUCAST: ciprofloxacin breakpoint value:  $>0.5 \mu\text{g/ml}$ , aztreonam  
945 breakpoint value:  $>16 \mu\text{g/ml}$  (EUCAST update 13. March 2017). This results in values above  
946 one equaling resistance and equal to or below one equaling sensitive. The response and the  
947 explanatory variables were log<sub>2</sub> transformed to get a better model fit for ciprofloxacin MIC,  
948 aztreonam MIC, Adhesion, and Aggregation. For the AA, Adhesion, Aggregation and growth  
949 rate in ASM was further normalized (before log<sub>2</sub> transformation) by scaling the values by  
950 the values of the laboratory strain PAO1 such that zero was equivalent to the PAO1  
951 phenotype measurement or the EUCAST MIC breakpoint. PAO1 was chosen to be the  
952 reference point of “wild type” phenotypes.

953

954 Because the mutations identified in our collection are based on our previous study (Marvig  
955 et al., 2015) where mutations were called within the different clone types, we added a  
956 second filtering step to identify mutation accumulation within patients. The second filtering  
957 step removed mutations present in all isolates of a lineage (a clone type within a specific  
958 patient) from the analysis.

959

960 All statistics were carried out in R (Team, 2017) using the packages *mgcv* (Wood, 2011;  
961 Wood et al., 2016) for the GAMM analysis and *archetype* (Eugster and Leisch, 2009, 2011;

962 Seth and Eugster, 2014) for the AA. Complementary packages used for analysis are:  
963 *tidyverse* (Wickham, 2017), *itsadug* (van Rij et al., 2017), *ggthemes* (Arnold, 2017), *knitr* (Xie,  
964 2017) and *kableExtra* (Zhu, 2017). We also referred to Thøgersen et al. (Thøgersen et al.,  
965 2013) and Fernandez et al. (Fernandez et al., 2017) in the design of appropriate assessment  
966 methods for the final AA model. We include two R markdown documents that explains our  
967 modeling steps and further evaluation plots in detail (AA: Supplemental file 1, GAMM:  
968 Supplemental file 2), and summarize our methods below in brief.

969

#### 970 Data modeling

971 *Archetype analysis (AA)*. We evaluated several different model fitting approaches by varying  
972 the number and type of phenotypes modeled as well as the archetype number and fit  
973 method, using RSS-based screeplots of stepped fits of differing archetype numbers,  
974 explained sample variance (ESV), isolate distribution among archetypes, convex hull  
975 projections of paired phenotypes (all combinations), and parallel coordinate plots as metrics  
976 for choosing the best fit parameters and approach to accurately represent our data.

977 Ultimately, we focused on 5 continuous phenotypes correlated with growth (growth rate in  
978 ASM), biofilm (adhesion and aggregation), and antibiotic resistance (aztreonam and  
979 ciprofloxacin MICs), which also were linked to relevant findings provided by the GAMM  
980 models. We used a root sum squared (RSS) versus archetype number screeplot of different  
981 fits to determine that a 6 archetype fit would produce the optimal model for this dataset.

982

983 We then performed 500 simulations of a 100 iteration fit using the “robustArchetypes”  
984 method (Eugster and Leisch, 2011), which reduces the impact of data outliers in fitting the  
985 convex hull of the data. We evaluated the mean ESV and the number of isolates with an ESV  
986 greater than 80% for the best model from each simulation in this study and differences in  
987 archetype characteristics to assess convergence, ultimately selecting the model with the  
988 second highest mean ESV (90.32%) and highest number of isolates with an ESV over 80%  
989 (87.13%); this model also resembled the other 10 top models of the simulation study. The  
990 order of archetypes around the simplex plot boundary is not reliant on the similarity of  
991 archetype characteristics, so relationships between phenotypes are not always obvious. We  
992 re-ordered the archetypes in the simplex plot by growth rate and secondarily antibiotic  
993 resistance to improve clarity in the complex 6 archetype plot. This reordering was also



994 justified when projecting the archetypes onto a PCA plot of the phenotypes (Supplemental  
995 file 1). All simplex plots have also had the 11 isolates with an ESV < 50% removed such that  
996 we are not drawing any conclusions from these poorly fit data (they are shown via simplex  
997 plot in the supplemental markdown).

998

999 *Generalized Additive Mixed Models (GAMMs)*. For all phenotypes, GAMMs were used to  
1000 identify evolutionary trends over time since first colonization. We correct for the patient  
1001 environment and inconsistent sampling over time using a smooth random factor. Models  
1002 were fitted in the following way: All continuously measured phenotypes included in the  
1003 Archetype analysis were fitted as a response variable ("predicted" or "dependent" variable  
1004 in Figure 3D) one-to-one, with both time as a "explanatory" or "independent" variable alone  
1005 and combined with each of the phenotypes to account for potential time-dependence of  
1006 the observations. Factorial/binary phenotypes were implemented as categorical functions  
1007 and continuous phenotypes as smooth functions, allowing for non-parametric fits. Normally  
1008 only one variable/phenotype of interest would be used as the predictor while other  
1009 alterable variables or factors would be used as explanatory variables to explain or predict  
1010 changes in the predictor. However, this requires a preconceived idea of a "one-way-  
1011 relationship" where one variable (the predictor) is assumed to be affected by certain other  
1012 variables (the explanatory variables), but where the explanatory variables cannot be  
1013 affected by the predictor. By testing all phenotypes against each other, we avoid  
1014 assumptions regarding the specific direction of relationships between the predictor variable  
1015 and the explanatory variable. Furthermore, in using the GAMMs we prioritize accuracy of  
1016 fitting but increase our risk of overfitting as a byproduct. We sought to counteract the risk  
1017 of overfitting by the default penalization of fits inherent to the method used (Wood, 2011;  
1018 Wood et al., 2016) and by model estimation via restricted maximum likelihood (REML)  
1019 which has been found to be more robust against overfitting (Wood, 2006, 2011). When  
1020 significant relationships were identified in one-to-one models (p-value < 0.05, as based on  
1021 Wald-type tests as described in (Wood, 2006, 2013)), all significant explanatory variables  
1022 were used to build a multi-trait model for the associated predictor. If select explanatory  
1023 phenotypes were then identified as non-significant (p-value > 0.05) in the multi-trait model,  
1024 they would be removed in a reduction step. To identify whether a reduced multi-trait model  
1025 resulted in a better fit than the initial multi-trait model, a Chi-square test was carried out on

1026 the models using the compareML function of the R package *itsadug* (van Rij et al., 2017)  
1027 (Figure 3D). The specific models and additional information can be found in Supplemental  
1028 file 2.

1029

1030 In demonstration of the utility of this approach, the multi-trait models of our 5 primary  
1031 predictor phenotypes show that at least one explanatory phenotype has a statistically  
1032 significant impact on the predictor phenotype. For all of the predictor phenotypes, multiple  
1033 explanatory traits preserved significant impacts after model reduction steps (Figure 3D and  
1034 Supplemental file 2). All mentions of significant relationships or correlations in the main text  
1035 are obtained from the GAMM analyses with Wald-type test statistics presenting p-values <  
1036 0.01, unless otherwise stated. For information on deviance explained,  $R^2$ , and degrees of  
1037 freedom for the individual models/variables, we refer to the Supplemental file 2.

1038

## 1039 SUPPLEMENTARY INFORMATION

1040 Supplemental File 1. Construction and assessment of the archetype model.

1041 Supplemental File 2. Construction and assessment of the generalized additive mixed  
1042 models.

1043 Supplemental Information.

1044 Figure S1. Hypermutators versus normomutators

1045 Figure S2. *mucA* and *algU* mutants

1046 Figure S3. *mexZ* mutants and drug efflux pumps

1047 Figure S4. Specific mutations in *gyrA/B* by patient and adhesion

1048 Figure S5. Adhesion of *gyrA/B* mutants (PAO1)

1049 Figure S6. Generation time of *gyrA/B* mutants (PAO1)

1050 Figure S7. Example growth curves

1051 Figure S8. Development of an aggregation metric

1052

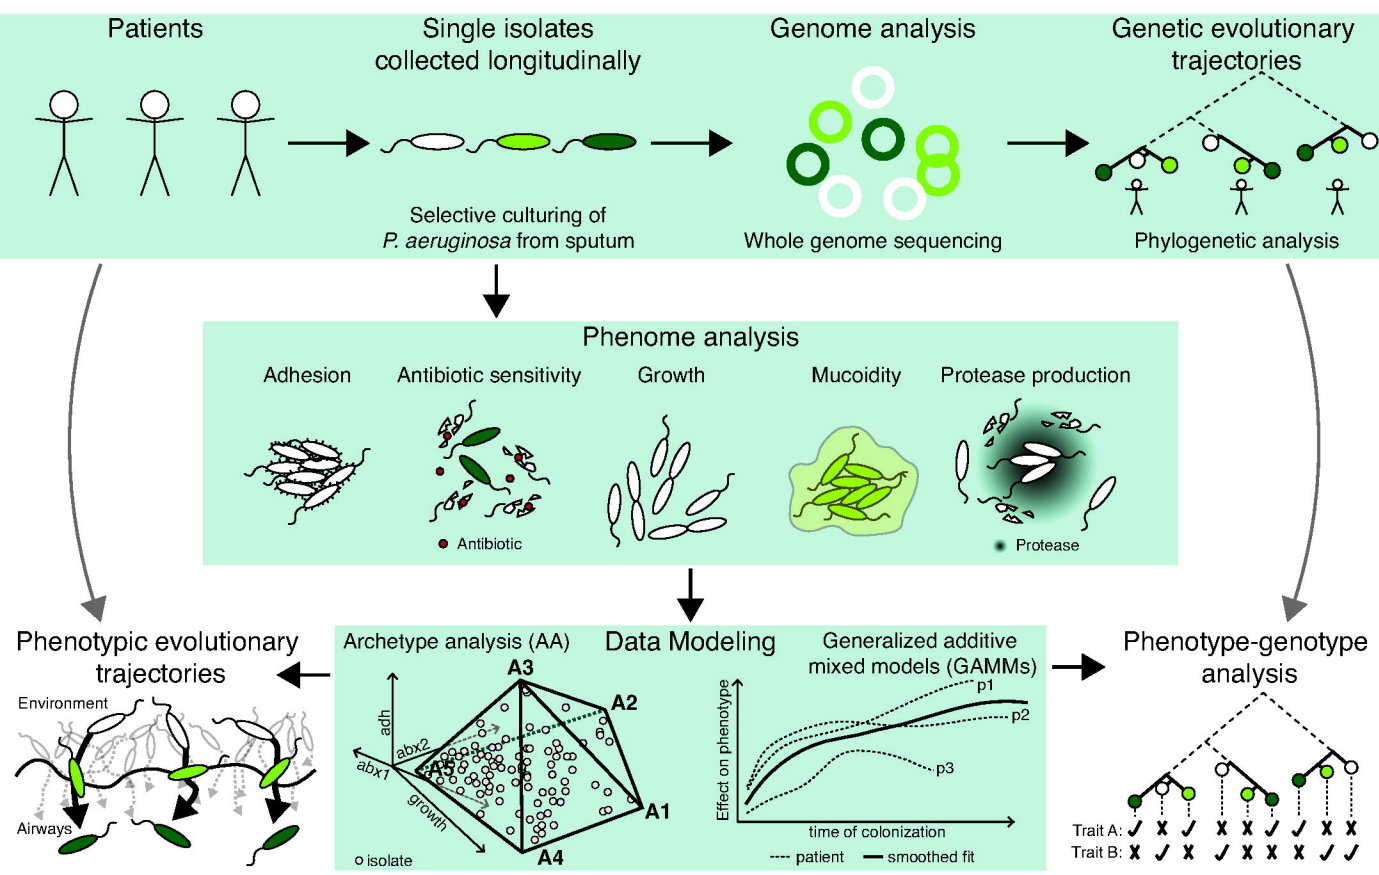

**Phenotype Screen**

|                          | mean (sd)     | PAO1  <br>abxBP |
|--------------------------|---------------|-----------------|
| ASM Growth Rate, $h-1$   | 0.59 (0.17)   | 0.85            |
| Adhesion,<br>OD590/OD630 | 1.69 (2.47)   | 2.53            |
| Aggregation, SDec/dOD    | 0.17 (0.2)    | 0.07            |
| Aztreonam, MIC           | 12.45 (55.66) | 16.00           |
| Ciprofloxacin, MIC       | 1.27 (4.02)   | 0.50            |
| Mucoidity (yes = 1)      | 0.11 (0.31)   | NA              |
| Protease (yes = 1)       | 0.92 (0.27)   | NA              |
| Hypermutator (yes = 1)   | 0.03 (0.18)   | NA              |

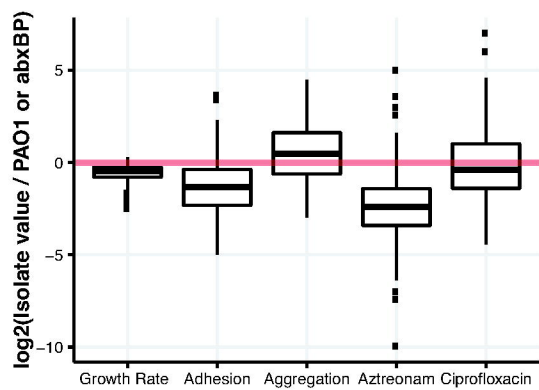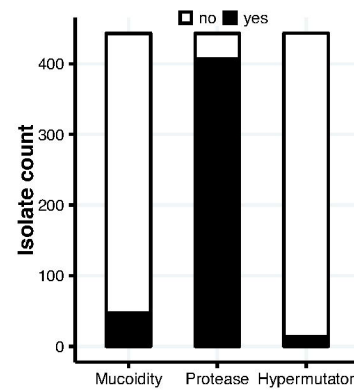

**Expected:**

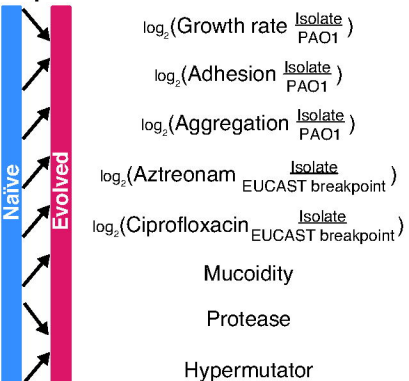

**Measured:**

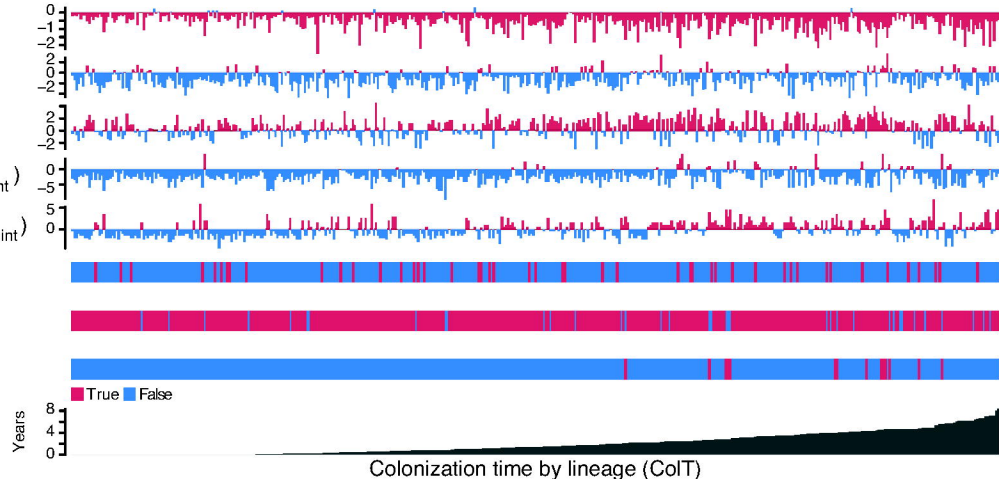

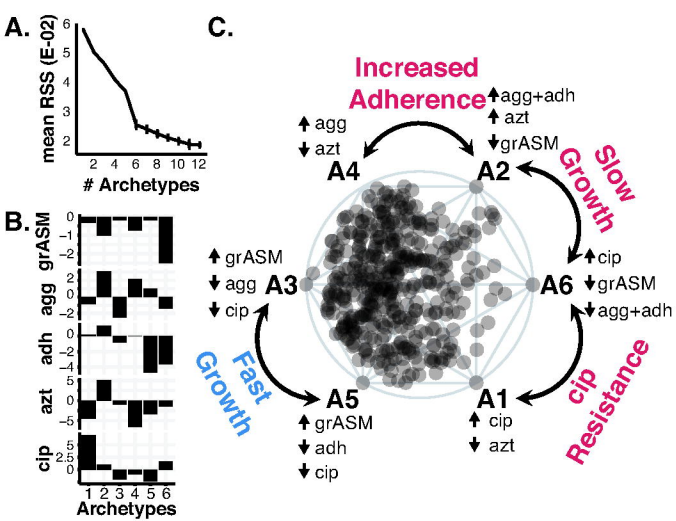

**D.**

| Predicted variable | Explanatory variables |         |         |        |        |         |         |        |
|--------------------|-----------------------|---------|---------|--------|--------|---------|---------|--------|
|                    | ColIT                 | grASM   | grLB    | azt    | adh    | agg     | prot    | mut    |
| grASM              | 0.0062                | -       | 2.0E-16 | -      | NA     | 6.8E-15 | -       | -      |
| grLB               | 0.0003                | 2.0E-16 | -       | NA     | -      | -       | -       | -      |
| azt                | -                     | -       | -       | -      | NA     | -       | -       | 0.0003 |
| cip                | 2.7E-07               | -       | -       | 0.0072 | -      | -       | -       | 0.0122 |
| adh                | -                     | NA      | 0.0063  | NA     | -      | 0.0001  | -       | -      |
| agg                | -                     | 3.0E-08 | -       | -      | 0.0053 | -       | 2.3E-05 | -      |

\*cip and mucoid as explanatory variables did not show any significant impact on any of the predictors.

### A. Growth rate in ASM

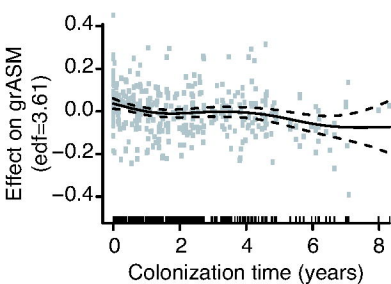

### B. Ciprofloxacin MIC

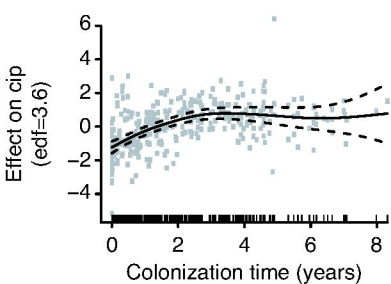

### C. Time-dependent adaptation

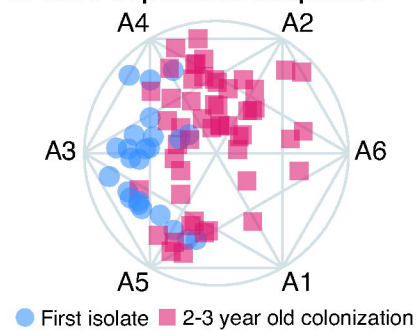

### D. Genetic adaptation

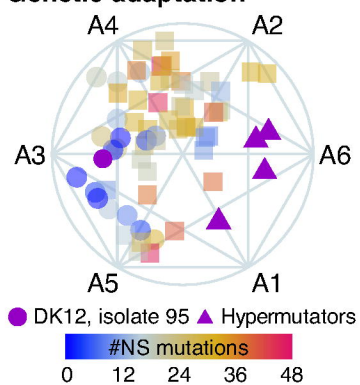

### E. Mutation counts

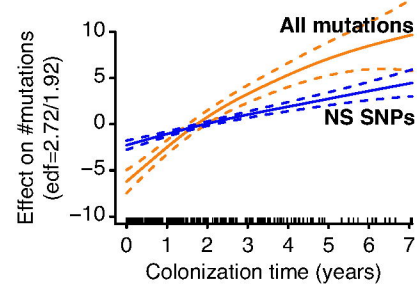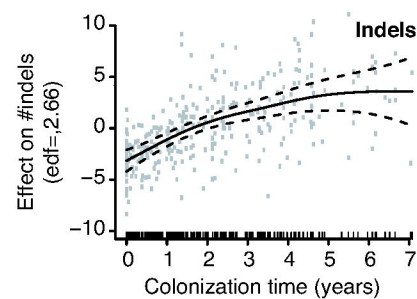

### A. Ciprofloxacin resistance genes (*gyrA* & *gyrB*)

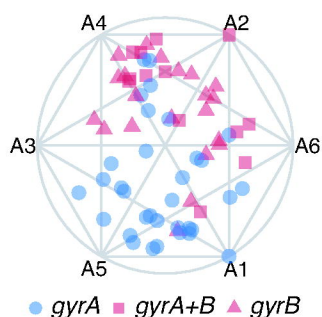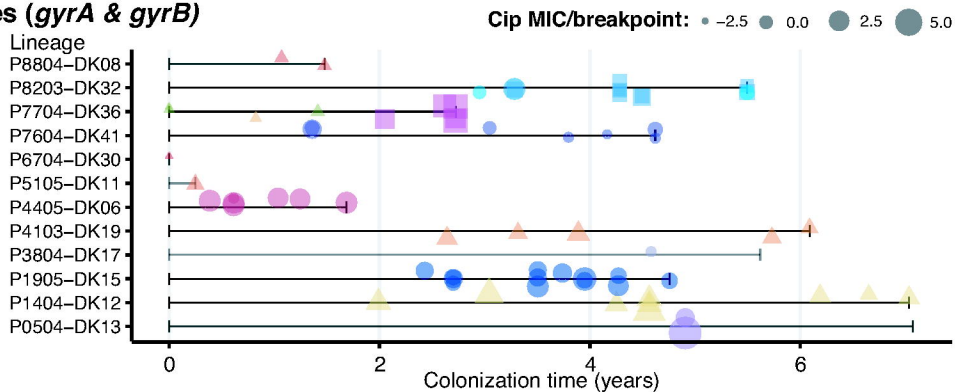

### B. Ciprofloxacin resistance genes (*nfxB*)

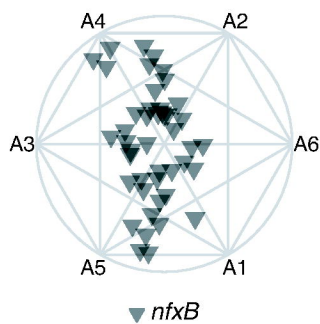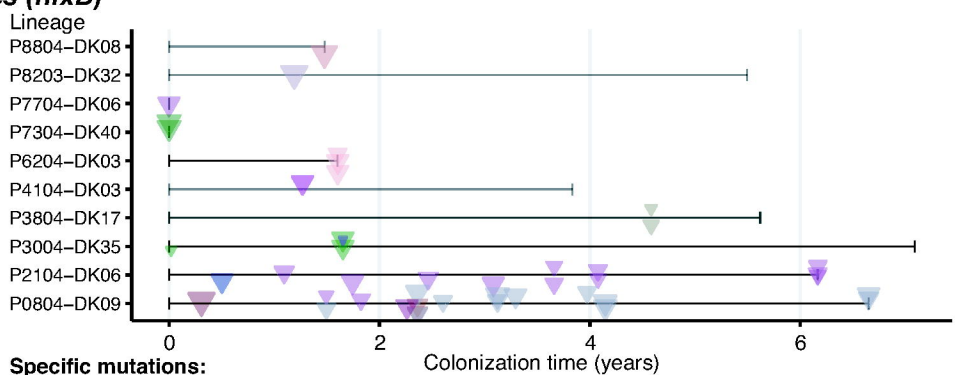

#### Specific mutations:

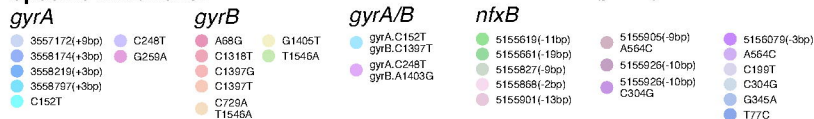

### C. *retS-gacA/S*

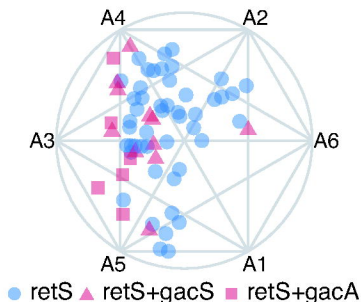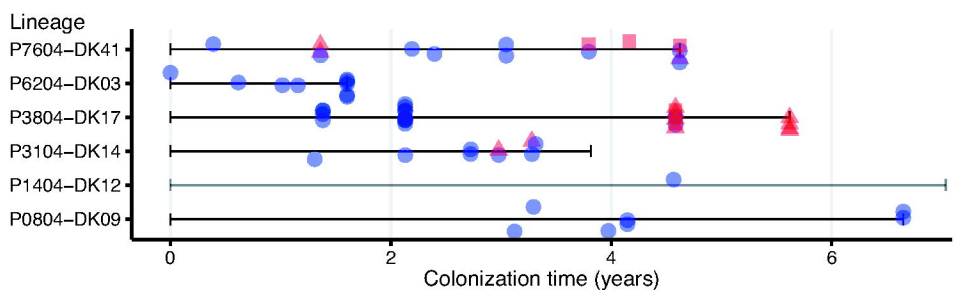

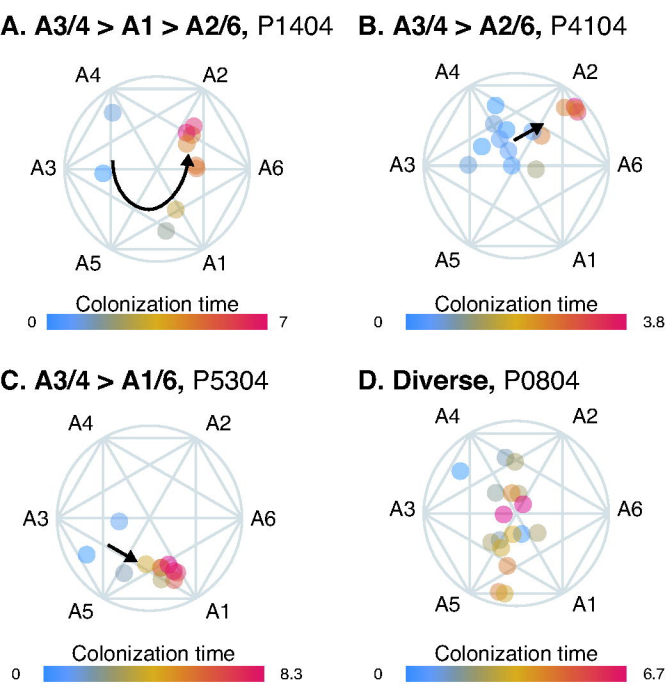

Source: http://biorxiv.org/content/10.1101/326025v1.full.pdf
